# Supplementary figures and images for: In Vivo Label-Free Observation of Tumor-Related Blood Vessels in Small Animals Using a Newly Designed Photoacoustic 3D Imaging System
Source: PubMed Central journal article supplement — Ultrason Imaging. 2022 May 13;44(2-3):96–104. doi: 10.1177/01617346221099201 (PMC9207988; doi:10.1177/01617346221099201), 2022-05-13

Supplementary Figure 1

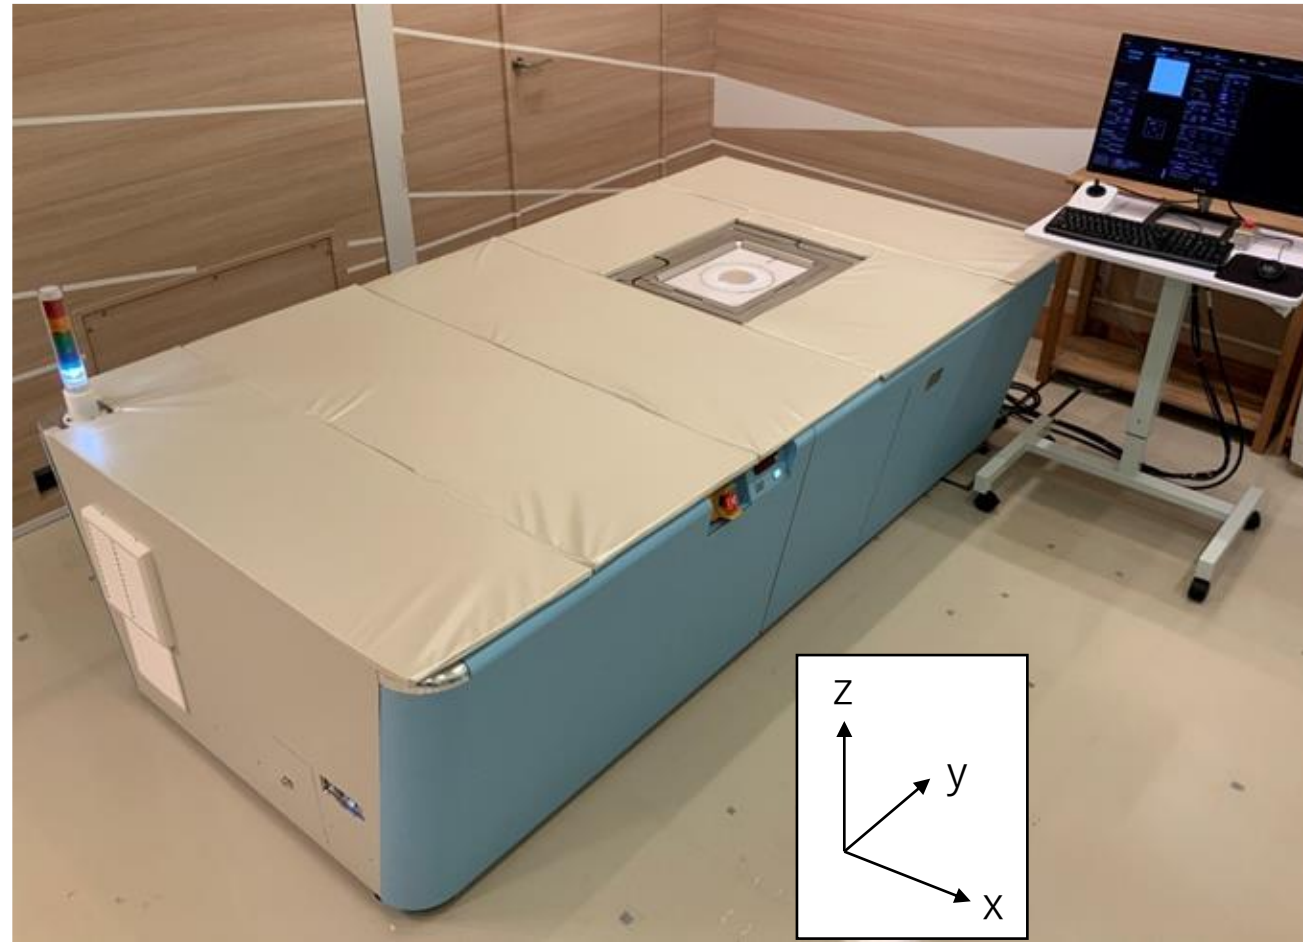

Supplementary Figure 2

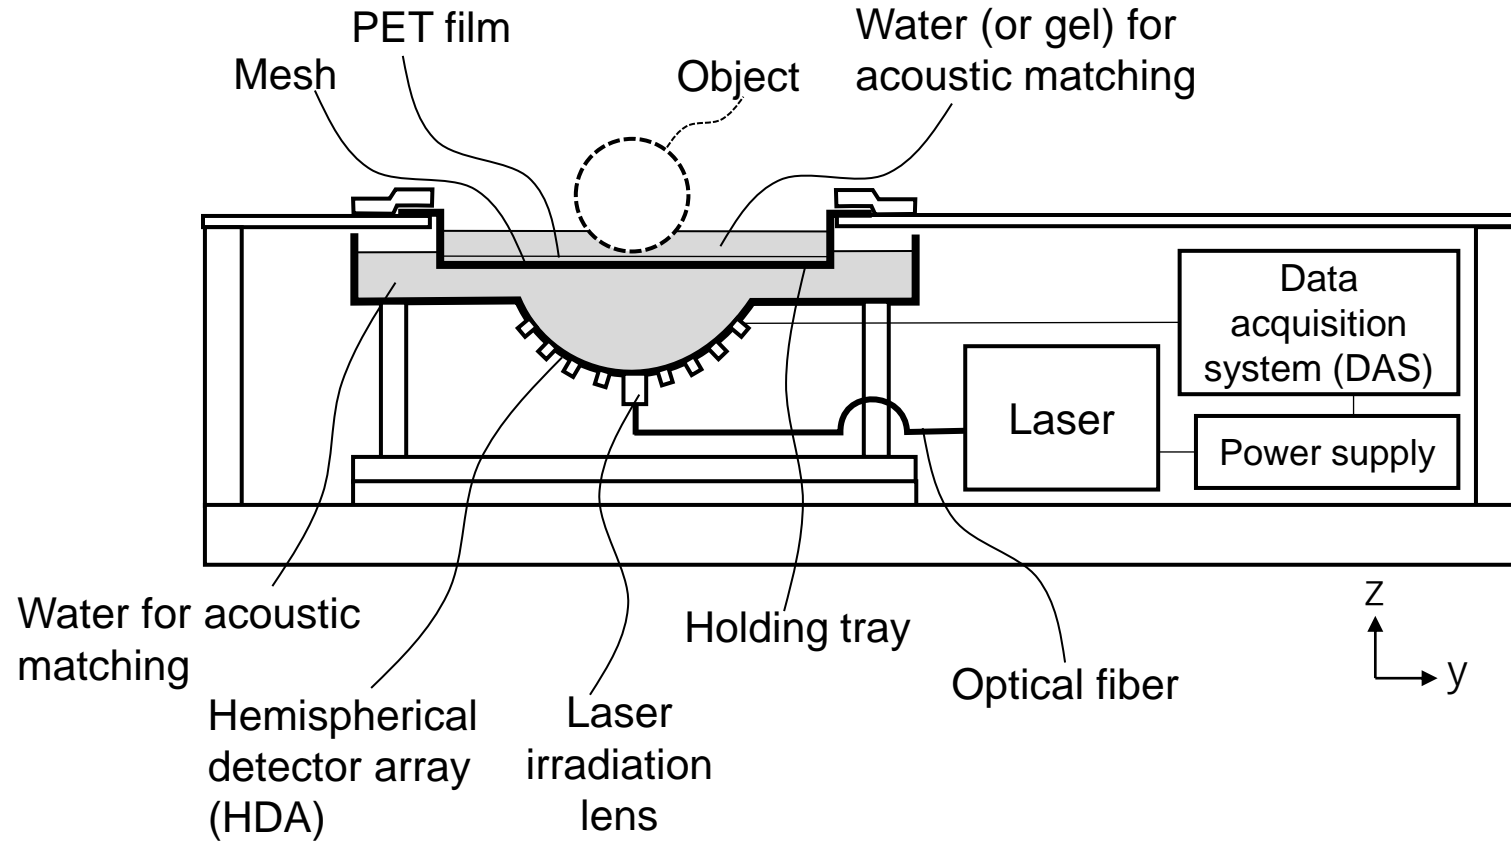

Supplementary Table 1

(mm)

|         | Group Number |       |       |
|---------|--------------|-------|-------|
| Element | 0            | 1     | 2     |
| 1       | 0.500        | 0.250 | 0.125 |
| 2       | 0.445        | 0.223 | 0.111 |
| 3       | 0.397        | 0.198 | 0.099 |
| 4       | 0.354        | 0.177 | 0.088 |
| 5       | 0.315        | 0.157 | 0.079 |
| 6       | 0.281        | 0.140 | 0.070 |

Supplement: sj-pdf-1-uix-10.1177_01617346221099201.pdf [file sj-pdf-1-uix-10.1177_01617346221099201.pdf]
